# Supplementary material for: Adsorption of SARS‐CoV‐2 Spike Protein S1 at Oxide Surfaces Studied by High‐Speed Atomic Force Microscopy
Source: PubMed Central journal article supplement (PMC7883093; doi:10.1002/anbr.202000024), 2020-12-18
Supplement: ANBR-1-2000024-s001.pdf [file ANBR-1-2000024-s001.pdf]

## Supporting Information

**Adsorption of SARS-CoV-2 Spike Protein S1 at Oxide Surfaces Studied by High-Speed Atomic Force Microscopy**

*Yang Xin, Guido Grundmeier, and Adrian Keller\**

*HS-AFM images of the pristine  $\text{Al}_2\text{O}_3(0001)$  and  $\text{TiO}_2(100)$  surfaces*

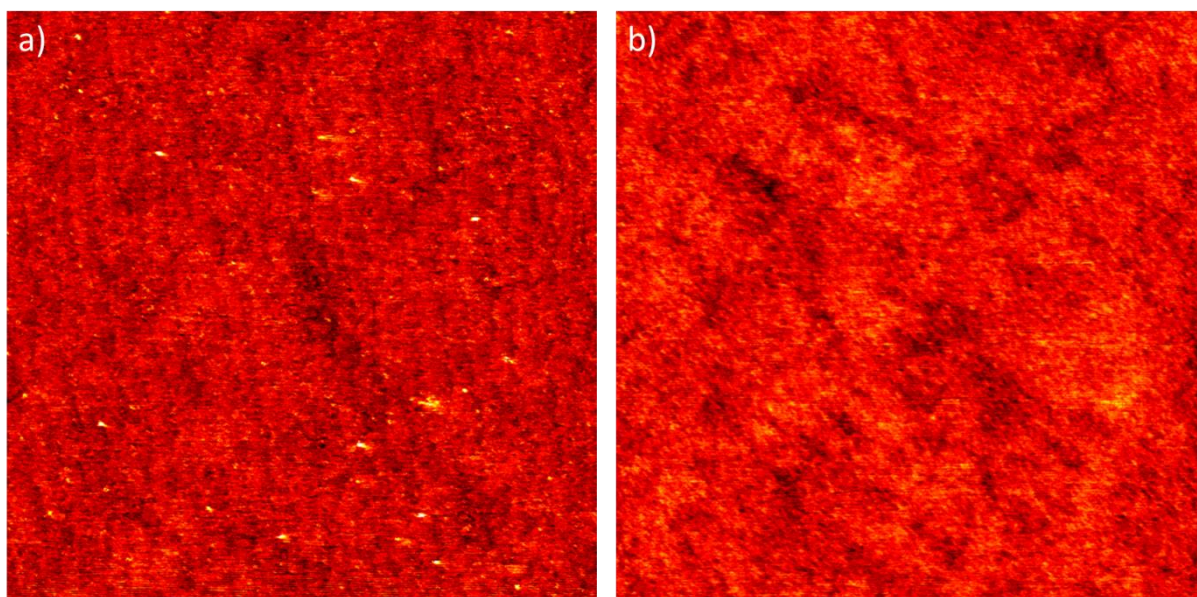

**Figure S1.** HS-AFM images of an  $\text{Al}_2\text{O}_3(0001)$  (a) and a  $\text{TiO}_2(100)$  substrate (b) in 10 mM Tris (pH 7.5) without proteins. The images have a size of  $1 \times 1 \mu\text{m}^2$  and a height scale of 2 nm.

*Additional AFM images and height distribution functions*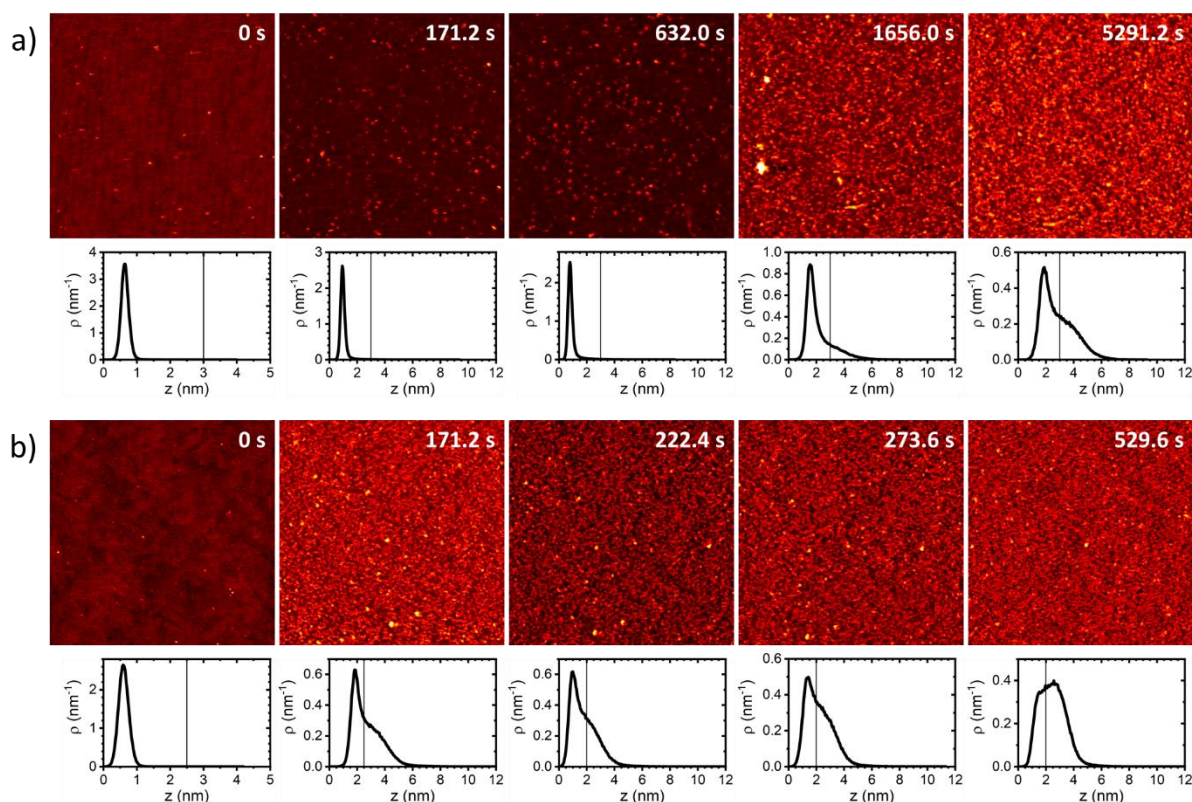

**Figure S2.** HS-AFM images ( $1 \times 1 \mu\text{m}^2$ ) of SARS-CoV-2 spike protein S1 in 10 mM Tris (pH 7.5) with 165 mM NaCl adsorbed to (a) an Al<sub>2</sub>O<sub>3</sub>(0001) and (b) a TiO<sub>2</sub>(100) surface recorded at different time points as indicated. Height scales are 5 nm for the clean substrate surfaces at 0 s and 12 nm for the protein covered surfaces at later time points. Below the HS-AFM images, the corresponding height distribution functions are depicted. The vertical lines in the plots represents the height thresholds applied in the statistical analyses.

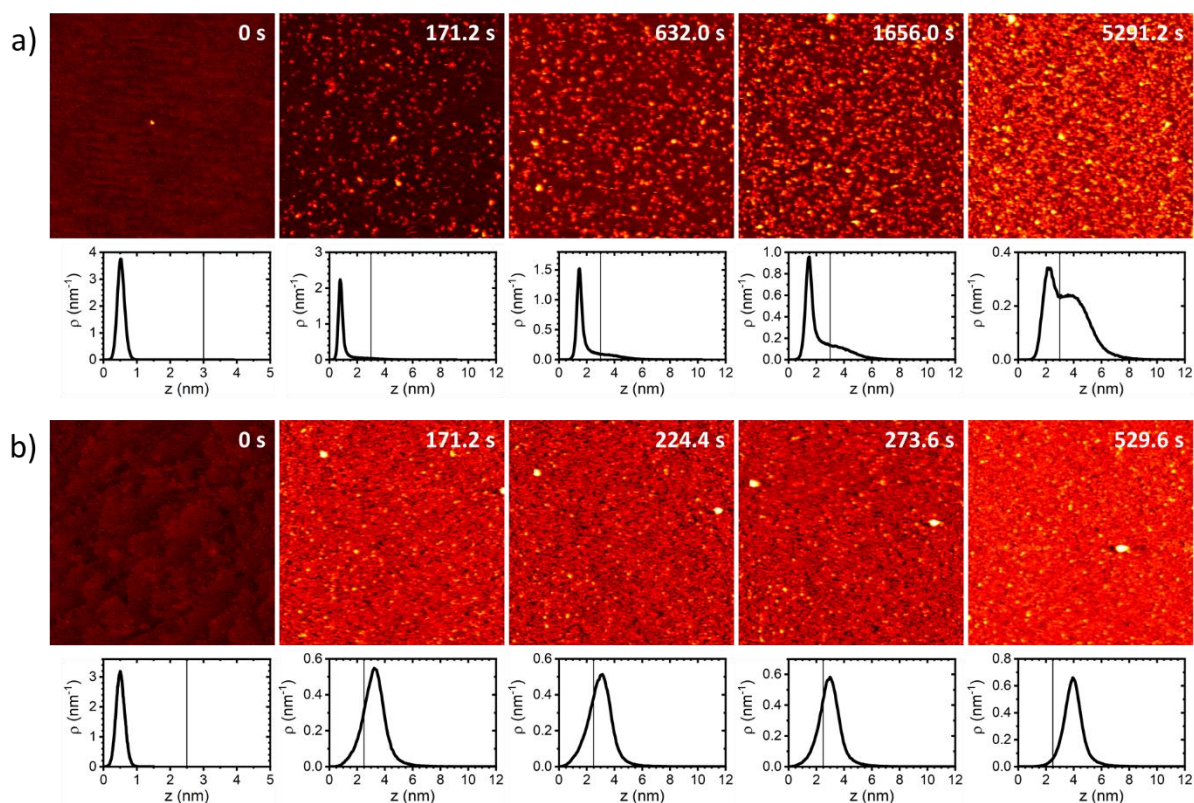

**Figure S3.** HS-AFM images ( $1 \times 1 \mu\text{m}^2$ ) of SARS-CoV-2 spike protein S1 in 10 mM Tris (pH 7.0) with 30 mM KCl and 15 mM NaCl adsorbed to (a) an Al<sub>2</sub>O<sub>3</sub>(0001) and (b) a TiO<sub>2</sub>(100) surface recorded at different time points as indicated. Height scales are 5 nm for the clean substrate surfaces at 0 s and 12 nm for the protein covered surfaces at later time points. Below the HS-AFM images, the corresponding height distribution functions are depicted. The vertical lines in the plots represents the height thresholds applied in the statistical analyses.



*Evaluation of tip effects*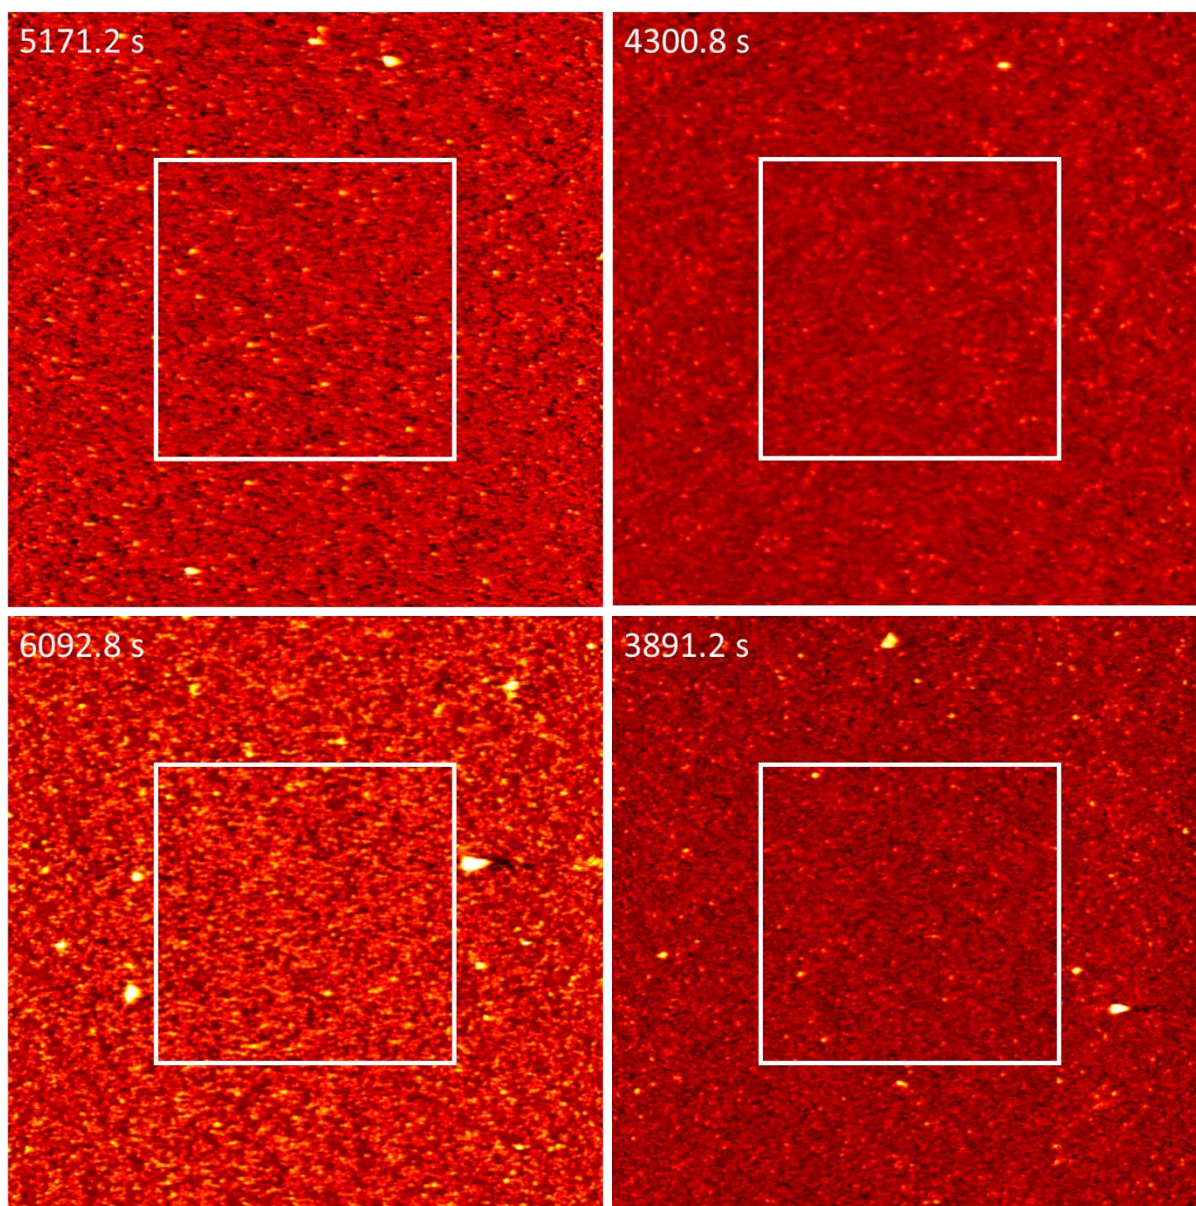

**Figure S4.** Zoomed-out HS-AFM images recorded after protein adsorption at  $\text{Al}_2\text{O}_3(0001)$  (left) and  $\text{TiO}_2(100)$  surfaces (right) in 10 mM Tris (pH 7.5) with (lower row) and without 165 mM NaCl (upper row). The images have a size of  $2 \times 2 \mu\text{m}^2$  and a height scale of 12 nm. The white squares indicate the  $1 \times 1 \mu\text{m}^2$  areas that have been continuously scanned during the experiments for the times indicated in the images. In neither image, an influence of the scanned tip can be noticed.
